# Supplementary material for: Integrative proteomics and m6A microarray analyses of the signatures induced by METTL3 reveals prognostically significant in gastric cancer by affecting cellular metabolism
Source: Front Oncol. 2022 Nov 16;12:996329. doi: 10.3389/fonc.2022.996329 (PMC9709115; doi:10.3389/fonc.2022.996329)
Supplement: Supplementary file 3 [file Table_2.xls]

## Sheet: Sheet 1
Ontology	ID	Description	GeneRatio	BgRatio	pvalue	p.adjust	qvalue	geneID	Count	zscore
BP	GO:0008655	pyrimidine-containing compound salvage	3/63	11/18670	5.93e-06	0.002	0.002	CDA/UCKL1/DCK	3	1.73205
BP	GO:0043097	pyrimidine nucleoside salvage	3/63	11/18670	5.93e-06	0.002	0.002	CDA/UCKL1/DCK	3	1.73205
BP	GO:0046134	pyrimidine nucleoside biosynthetic process	4/63	29/18670	2.62e-06	0.002	0.002	CDA/UCKL1/DCK/NME1	4	2
BP	GO:0043094	cellular metabolic compound salvage	4/63	34/18670	5.06e-06	0.002	0.002	CDA/UCKL1/ADI1/DCK	4	2
CC	GO:0030017	sarcomere	6/67	204/19717	6.73e-05	0.002	0.001	ENO1/FLNA/TPM4/FKBP1A/PARVA/TNNC1	6	2.44949
MF	GO:0042277	peptide binding	7/66	295/17697	1.12e-04	0.006	0.005	ANXA5/PPIA/NOLC1/HLA-C/HLA-A/CRIP1/HLA-B	7	2.64575
CC	GO:0005925	focal adhesion	8/67	405/19717	6.69e-05	0.002	0.001	LASP1/ANXA5/FLNA/CNN2/TPM4/MAP4K4/PPIA/PARVA	8	2.82843
CC	GO:0005924	cell-substrate adherens junction	8/67	408/19717	7.04e-05	0.002	0.001	LASP1/ANXA5/FLNA/CNN2/TPM4/MAP4K4/PPIA/PARVA	8	2.82843
CC	GO:0030055	cell-substrate junction	8/67	412/19717	7.54e-05	0.002	0.001	LASP1/ANXA5/FLNA/CNN2/TPM4/MAP4K4/PPIA/PARVA	8	2.82843
MF	GO:0045296	cadherin binding	8/66	331/17697	3.08e-05	0.003	0.003	LASP1/TAGLN2/ENO1/FLNA/CNN2/VASN/PARVA/DNAJB1	8	2.82843
MF	GO:0033218	amide binding	8/66	356/17697	5.15e-05	0.003	0.003	ANXA5/DBI/PPIA/NOLC1/HLA-C/HLA-A/CRIP1/HLA-B	8	2.82843
MF	GO:0003779	actin binding	9/66	431/17697	3.00e-05	0.003	0.003	LASP1/FLNA/CNN2/TPM4/PARVA/EPB41L3/TNNC1/TMSB10/TMSB4X	9	3
