# Supplementary material for: Integrative proteomics and m6A microarray analyses of the signatures induced by METTL3 reveals prognostically significant in gastric cancer by affecting cellular metabolism
Source: Front Oncol. 2022 Nov 16;12:996329. doi: 10.3389/fonc.2022.996329 (PMC9709115; doi:10.3389/fonc.2022.996329)
Supplement: Supplementary file 4 [file Table_3.xls]

## Sheet: tcgaUniCox
Gene	coeffients
DCK	-0.025743
TMEM164	-0.0150393
ANXA5	0.00325871
OPLAH	-0.0106181
NOS3	0.0896067
DNPEP	-0.0113573
EPB41L3	0.0369426
id	HR	HR.95L	HR.95H	pvalue
DCK	0.956825	0.918725	0.996505	0.0332695
TMEM164	0.969169	0.941881	0.997248	0.0316287
ANXA5	1.0045	1.0014	1.0076	0.0044106
OPLAH	0.978795	0.959906	0.998056	0.031111
NOS3	1.09436	1.04139	1.15002	0.000367598
DNPEP	0.964748	0.930879	0.999849	0.0490395
EPB41L3	1.05392	1.00881	1.10104	0.0186202
