# Supplementary material for: Integrative proteomics and m6A microarray analyses of the signatures induced by METTL3 reveals prognostically significant in gastric cancer by affecting cellular metabolism
Source: Front Oncol. 2022 Nov 16;12:996329. doi: 10.3389/fonc.2022.996329 (PMC9709115; doi:10.3389/fonc.2022.996329)
Supplement: Supplementary file 5 [file Table_4.xls]

## Sheet: Sheet1
ONTOLOGY	ID	Description	GeneRatio	BgRatio	pvalue	p.adjust	qvalue	geneID	Count	zscore
BP	GO:0070482	response to oxygen levels	54/1536	394/18670	0.000141368	0.0136052	0.0118685	AIFM1/ARNT2/BACH1/CDKN1A/CPEB1/CPEB2/CXCR4/CYBB/DNMT3A/DPP4/EDNRA/EGR1/EIF4EBP1/EP300/EPAS1/ETS1/FAS/FOXO3/HIF1A/HIF3A/HMOX2/LEP/MDM2/MDM4/MMP2/MTHFR/MYC/NDRG1/NFE2L2/NOS2/OXTR/PDGFRB/PDK3/PMAIP1/PML/PPARD/PRKCE/PSMA5/PSMA7/PSMD11/PSMD7/PTEN/PTGS2/RAMP2/STC1/STC2/STOX1/TH/TMBIM6/TSC1/UBB/USF1/VEGFA/ZFP36L1	54	-4.35465
BP	GO:0009743	response to carbohydrate	37/1536	230/18670	6.14194e-05	0.0103079	0.00899217	ACVR2B/APOB/CDK16/CMA1/DYNLL1/EGR1/ERN1/FOXO3/GHRL/HIF1A/HMGCR/HNF1B/KLF7/LEP/MAFA/MAP2K6/MEN1/NADK/NR1D1/OPRK1/PCK2/PDK3/PPARD/PRKCE/PTEN/PTGS2/PTPRN/RFX6/SESN2/SIN3A/STXBP4/TCF7L2/TH/TXNIP/XBP1/ZBTB20/ZFP36L1	37	-4.10997
BP	GO:0071333	cellular response to glucose stimulus	23/1536	133/18670	0.000509546	0.0268729	0.0234427	CDK16/CMA1/DYNLL1/ERN1/FOXO3/GHRL/HIF1A/HMGCR/KLF7/MEN1/NADK/NR1D1/OPRK1/PCK2/PDK3/PRKCE/PTPRN/RFX6/SIN3A/STXBP4/TH/XBP1/ZBTB20	23	-2.29366
KEGG	hsa04010	MAPK signaling pathway	41/733	294/8076	0.00341386	0.0427415	0.0369416	ARRB2/ATF2/BRAF/CACNA1G/CACNG8/CDC25B/DDIT3/DUSP1/DUSP10/DUSP4/DUSP6/EGFR/EPHA2/EREG/FAS/FGF2/FGF6/FGFR1/FGFR3/FOS/GADD45A/GADD45B/GRB2/HGF/HSPA6/HSPA8/HSPB1/IL1R1/IRAK4/KRAS/MAP2K6/MEF2C/MYC/NFATC1/NFKB1/PDGFRB/PPP3CC/PTPN5/SOS1/SOS2/VEGFA	41	-5.15373
KEGG	hsa04068	FoxO signaling pathway	28/733	131/8076	1.30044e-05	0.0020457	0.0017681	BCL2L11/BCL6/BRAF/CDKN1A/CSNK1E/EGFR/EP300/FBXO32/FOXO3/FOXO6/GADD45A/GADD45B/GRB2/HOMER1/IRS1/KLF2/KRAS/MDM2/PCK2/PDPK1/PRKAG1/PTEN/SETD7/SGK1/SKP2/SOS1/SOS2/STAT3	28	-4.15761
KEGG	hsa04150	mTOR signaling pathway	27/733	155/8076	0.000676286	0.0176398	0.0152461	BRAF/DVL1/EIF4E/EIF4EBP1/FZD10/GRB2/IRS1/KRAS/LPIN3/MAPKAP1/PDPK1/PTEN/RRAGA/RRAGB/RRAGC/SESN2/SGK1/SKP2/SLC3A2/SLC7A5/SOS1/SOS2/TSC1/TSC2/ULK1/WNT10A/WNT5A	27	-2.88675
KEGG	hsa04350	TGF-beta signaling pathway	16/733	94/8076	0.00992683	0.0941545	0.0813778	ACVR2B/AMH/BMP6/BMPR1B/EP300/FST/ID2/INHBB/LTBP1/MYC/NOG/RBL1/RGMB/ROCK1/SP1/THSD4	16	-4
