# Supplementary material for: Integrative proteomics and m6A microarray analyses of the signatures induced by METTL3 reveals prognostically significant in gastric cancer by affecting cellular metabolism
Source: Front Oncol. 2022 Nov 16;12:996329. doi: 10.3389/fonc.2022.996329 (PMC9709115; doi:10.3389/fonc.2022.996329)
Supplement: Supplementary file 6 [file Table_5.xls]

## Sheet: PRGcluster
ID	PRGcluster
TCGA_TCGA-BR-8682	A
TCGA_TCGA-R5-A7ZR	B
TCGA_TCGA-FP-8099	B
TCGA_TCGA-MX-A666	B
TCGA_TCGA-CD-8534	A
TCGA_TCGA-BR-7717	B
TCGA_TCGA-IN-A6RO	B
TCGA_TCGA-CG-5716	B
TCGA_TCGA-BR-4256	A
TCGA_TCGA-CD-8527	B
TCGA_TCGA-BR-A44U	B
TCGA_TCGA-D7-A6EZ	B
TCGA_TCGA-RD-A8N5	B
TCGA_TCGA-F1-A72C	B
TCGA_TCGA-CD-A48C	B
TCGA_TCGA-BR-8369	A
TCGA_TCGA-BR-8081	A
TCGA_TCGA-IN-7806	B
TCGA_TCGA-CD-A4MG	B
TCGA_TCGA-BR-7901	A
TCGA_TCGA-BR-4294	B
TCGA_TCGA-CD-A487	B
TCGA_TCGA-BR-8284	A
TCGA_TCGA-BR-4267	B
TCGA_TCGA-BR-8368	B
TCGA_TCGA-CG-5724	A
TCGA_TCGA-BR-7716	B
TCGA_TCGA-CD-5800	B
TCGA_TCGA-HU-A4HB	B
TCGA_TCGA-D7-A747	A
TCGA_TCGA-BR-7197	B
TCGA_TCGA-R5-A7ZE	B
TCGA_TCGA-BR-8060	A
TCGA_TCGA-VQ-A91D	A
TCGA_TCGA-KB-A93J	B
TCGA_TCGA-FP-8211	B
TCGA_TCGA-BR-8590	A
TCGA_TCGA-CG-5718	B
TCGA_TCGA-BR-4279	A
TCGA_TCGA-HF-7133	A
TCGA_TCGA-VQ-A8PE	B
TCGA_TCGA-D7-A4YX	B
TCGA_TCGA-BR-A4J5	A
TCGA_TCGA-HU-A4GT	B
TCGA_TCGA-BR-6452	B
TCGA_TCGA-VQ-A8PX	B
TCGA_TCGA-VQ-A94P	A
TCGA_TCGA-BR-6564	A
TCGA_TCGA-VQ-A91V	B
TCGA_TCGA-D7-6522	A
TCGA_TCGA-SW-A7EB	B
TCGA_TCGA-IN-A6RI	B
TCGA_TCGA-BR-4369	A
TCGA_TCGA-VQ-A94R	A
TCGA_TCGA-CD-5803	A
TCGA_TCGA-BR-8680	B
TCGA_TCGA-BR-A4J8	B
TCGA_TCGA-VQ-A8P5	A
TCGA_TCGA-BR-A44T	A
TCGA_TCGA-VQ-A8PU	B
TCGA_TCGA-D7-8574	A
TCGA_TCGA-D7-6822	B
TCGA_TCGA-HU-A4H0	B
TCGA_TCGA-BR-6566	B
TCGA_TCGA-CG-5720	A
TCGA_TCGA-IN-A6RL	B
TCGA_TCGA-HU-8608	A
TCGA_TCGA-BR-7707	B
TCGA_TCGA-VQ-A8E7	B
TCGA_TCGA-RD-A8MV	B
TCGA_TCGA-VQ-A94T	A
TCGA_TCGA-BR-8687	A
TCGA_TCGA-IN-A7NT	B
TCGA_TCGA-CG-5719	B
TCGA_TCGA-BR-7704	B
TCGA_TCGA-CD-A489	A
TCGA_TCGA-FP-7916	A
TCGA_TCGA-HF-7131	B
TCGA_TCGA-KB-A93G	A
TCGA_TCGA-RD-A7BS	B
TCGA_TCGA-BR-8380	A
TCGA_TCGA-BR-4253	A
TCGA_TCGA-BR-8484	A
TCGA_TCGA-VQ-A8P2	B
TCGA_TCGA-BR-4363	A
TCGA_TCGA-VQ-A94U	B
TCGA_TCGA-CG-4438	A
TCGA_TCGA-IN-A6RJ	B
TCGA_TCGA-IN-7808	A
TCGA_TCGA-BR-4191	A
TCGA_TCGA-BR-A4PF	B
TCGA_TCGA-BR-6852	B
TCGA_TCGA-VQ-A8PH	B
TCGA_TCGA-BR-7851	B
TCGA_TCGA-VQ-A927	B
TCGA_TCGA-BR-A4J6	B
TCGA_TCGA-CG-4462	A
TCGA_TCGA-VQ-AA6F	B
TCGA_TCGA-CG-5717	A
TCGA_TCGA-CG-4440	B
TCGA_TCGA-VQ-A8DT	B
TCGA_TCGA-D7-A4YU	A
TCGA_TCGA-BR-6709	A
TCGA_TCGA-HU-8238	B
TCGA_TCGA-CG-4444	A
TCGA_TCGA-RD-A8MW	B
TCGA_TCGA-VQ-A8PD	A
TCGA_TCGA-VQ-A8E2	A
TCGA_TCGA-BR-4201	A
TCGA_TCGA-RD-A8N2	A
TCGA_TCGA-VQ-A8P8	B
TCGA_TCGA-HU-A4H6	B
TCGA_TCGA-BR-4366	B
TCGA_TCGA-CG-4443	B
TCGA_TCGA-B7-A5TI	B
TCGA_TCGA-CG-4305	A
TCGA_TCGA-BR-8588	B
TCGA_TCGA-CG-4475	A
TCGA_TCGA-VQ-A8PK	B
TCGA_TCGA-CD-5799	B
TCGA_TCGA-D7-A6EV	B
TCGA_TCGA-D7-5577	B
TCGA_TCGA-ZA-A8F6	A
TCGA_TCGA-HU-A4GJ	A
TCGA_TCGA-RD-A8N4	A
TCGA_TCGA-CG-4436	B
TCGA_TCGA-D7-8579	A
TCGA_TCGA-MX-A5UG	A
TCGA_TCGA-VQ-A8E3	B
TCGA_TCGA-BR-A4J9	A
TCGA_TCGA-HU-A4GP	B
TCGA_TCGA-BR-6565	B
TCGA_TCGA-VQ-A8PB	B
TCGA_TCGA-HU-A4GY	A
TCGA_TCGA-BR-8361	B
TCGA_TCGA-BR-4367	A
TCGA_TCGA-ZQ-A9CR	B
TCGA_TCGA-CG-4304	A
TCGA_TCGA-RD-A7BT	B
TCGA_TCGA-VQ-A925	A
TCGA_TCGA-FP-A4BF	B
TCGA_TCGA-BR-8384	A
TCGA_TCGA-D7-6527	B
TCGA_TCGA-HF-7132	A
TCGA_TCGA-VQ-A8PC	A
TCGA_TCGA-VQ-A8PQ	A
TCGA_TCGA-MX-A5UJ	B
TCGA_TCGA-VQ-A91Z	B
TCGA_TCGA-FP-7829	B
TCGA_TCGA-HU-A4GC	B
TCGA_TCGA-BR-6563	A
TCGA_TCGA-VQ-AA6A	B
TCGA_TCGA-BR-A4CR	A
TCGA_TCGA-HU-A4G2	A
TCGA_TCGA-CG-4460	A
TCGA_TCGA-CG-4465	A
TCGA_TCGA-CD-8529	A
TCGA_TCGA-BR-4370	A
TCGA_TCGA-HF-7134	B
TCGA_TCGA-HU-8249	A
TCGA_TCGA-IN-A6RN	B
TCGA_TCGA-HU-A4GD	B
TCGA_TCGA-BR-A4IV	A
TCGA_TCGA-HU-A4H5	B
TCGA_TCGA-D7-6525	A
TCGA_TCGA-HU-A4H2	B
TCGA_TCGA-CG-5726	B
TCGA_TCGA-IN-AB1V	B
TCGA_TCGA-FP-8210	A
TCGA_TCGA-VQ-AA68	B
TCGA_TCGA-BR-4280	B
TCGA_TCGA-VQ-AA64	A
TCGA_TCGA-VQ-A91E	B
TCGA_TCGA-VQ-AA6J	B
TCGA_TCGA-VQ-A928	A
TCGA_TCGA-CD-8532	B
TCGA_TCGA-BR-8679	B
TCGA_TCGA-CG-5725	B
TCGA_TCGA-BR-8080	A
TCGA_TCGA-IN-A7NR	B
TCGA_TCGA-BR-4368	A
TCGA_TCGA-BR-8058	A
TCGA_TCGA-HU-8602	A
TCGA_TCGA-BR-8690	B
TCGA_TCGA-VQ-A91X	B
TCGA_TCGA-3M-AB47	A
TCGA_TCGA-HU-A4GF	B
TCGA_TCGA-RD-A8N6	A
TCGA_TCGA-VQ-AA6K	B
TCGA_TCGA-VQ-A922	A
TCGA_TCGA-HU-A4GU	B
TCGA_TCGA-R5-A7ZF	B
TCGA_TCGA-D7-8576	B
TCGA_TCGA-CD-5813	A
TCGA_TCGA-BR-8286	B
TCGA_TCGA-BR-8486	B
TCGA_TCGA-CG-4476	A
TCGA_TCGA-BR-8683	A
TCGA_TCGA-IP-7968	A
TCGA_TCGA-BR-8291	A
TCGA_TCGA-BR-7723	A
TCGA_TCGA-CG-5723	A
TCGA_TCGA-CD-A4MH	B
TCGA_TCGA-BR-A4CS	B
TCGA_TCGA-BR-8364	A
TCGA_TCGA-FP-8209	A
TCGA_TCGA-BR-6801	B
TCGA_TCGA-B7-A5TN	B
TCGA_TCGA-BR-4357	B
TCGA_TCGA-BR-8381	B
TCGA_TCGA-CD-8524	A
TCGA_TCGA-VQ-A8PJ	B
TCGA_TCGA-D7-8573	B
TCGA_TCGA-VQ-A8PF	B
TCGA_TCGA-F1-6177	B
TCGA_TCGA-BR-8059	A
TCGA_TCGA-BR-8382	B
TCGA_TCGA-BR-8077	B
TCGA_TCGA-D7-6521	A
TCGA_TCGA-CD-5801	B
TCGA_TCGA-BR-7196	A
TCGA_TCGA-CG-5732	B
TCGA_TCGA-EQ-8122	B
TCGA_TCGA-FP-7998	A
TCGA_TCGA-D7-6524	A
TCGA_TCGA-BR-8366	A
TCGA_TCGA-HU-A4GQ	A
TCGA_TCGA-HU-A4H8	B
TCGA_TCGA-KB-A6F7	A
TCGA_TCGA-VQ-A8E0	B
TCGA_TCGA-BR-8483	B
TCGA_TCGA-IN-A6RR	B
TCGA_TCGA-VQ-A8DZ	B
TCGA_TCGA-IN-AB1X	A
TCGA_TCGA-3M-AB46	B
TCGA_TCGA-FP-8631	B
TCGA_TCGA-BR-7715	B
TCGA_TCGA-D7-6519	B
TCGA_TCGA-BR-4257	B
TCGA_TCGA-D7-6815	A
TCGA_TCGA-BR-4187	A
TCGA_TCGA-CD-8530	A
TCGA_TCGA-BR-6456	A
TCGA_TCGA-BR-8485	A
TCGA_TCGA-R5-A805	B
TCGA_TCGA-MX-A663	A
TCGA_TCGA-FP-A8CX	B
TCGA_TCGA-HU-A4H3	B
TCGA_TCGA-CD-8535	A
TCGA_TCGA-BR-8589	B
TCGA_TCGA-D7-A6F2	B
TCGA_TCGA-VQ-A8PM	A
TCGA_TCGA-VQ-A94O	B
TCGA_TCGA-KB-A93H	B
TCGA_TCGA-VQ-A923	B
TCGA_TCGA-CD-8526	A
TCGA_TCGA-SW-A7EA	B
TCGA_TCGA-BR-7959	A
TCGA_TCGA-RD-A8NB	A
TCGA_TCGA-B7-A5TJ	B
TCGA_TCGA-CG-4442	A
TCGA_TCGA-BR-8678	B
TCGA_TCGA-RD-A7C1	B
TCGA_TCGA-HU-8604	B
TCGA_TCGA-D7-A6F0	B
TCGA_TCGA-VQ-AA6G	B
TCGA_TCGA-F1-A448	B
TCGA_TCGA-BR-6458	A
TCGA_TCGA-BR-4361	A
TCGA_TCGA-BR-8367	A
TCGA_TCGA-BR-8677	A
TCGA_TCGA-FP-A9TM	B
TCGA_TCGA-VQ-A91K	B
TCGA_TCGA-HJ-7597	B
TCGA_TCGA-HU-A4G3	B
TCGA_TCGA-HU-A4GH	B
TCGA_TCGA-R5-A7ZI	B
TCGA_TCGA-BR-8365	A
TCGA_TCGA-D7-A74A	B
TCGA_TCGA-F1-6874	B
TCGA_TCGA-BR-6802	B
TCGA_TCGA-BR-8676	B
TCGA_TCGA-BR-A4J7	A
TCGA_TCGA-BR-A4QL	B
TCGA_TCGA-BR-7958	B
TCGA_TCGA-FP-7735	B
TCGA_TCGA-BR-8372	A
TCGA_TCGA-CD-8525	B
TCGA_TCGA-CD-8531	A
TCGA_TCGA-BR-6455	B
TCGA_TCGA-BR-8686	A
TCGA_TCGA-CG-5721	A
TCGA_TCGA-VQ-A91S	B
TCGA_TCGA-D7-6818	A
TCGA_TCGA-VQ-A8DU	B
TCGA_TCGA-B7-A5TK	A
TCGA_TCGA-VQ-A924	B
TCGA_TCGA-BR-8373	A
TCGA_TCGA-IN-8663	A
TCGA_TCGA-BR-A4J4	A
TCGA_TCGA-VQ-A91U	B
TCGA_TCGA-BR-6705	A
TCGA_TCGA-F1-6875	B
TCGA_TCGA-D7-5578	B
TCGA_TCGA-D7-A6EX	B
TCGA_TCGA-HU-8244	B
TCGA_TCGA-BR-7957	A
TCGA_TCGA-HU-A4HD	B
TCGA_TCGA-HU-8610	B
TCGA_TCGA-VQ-A91Y	A
TCGA_TCGA-D7-A4Z0	B
TCGA_TCGA-HU-A4G9	B
TCGA_TCGA-BR-8591	B
TCGA_TCGA-BR-8297	A
TCGA_TCGA-D7-8570	B
TCGA_TCGA-VQ-A91A	A
TCGA_TCGA-HF-A5NB	B
TCGA_TCGA-BR-6710	B
TCGA_TCGA-VQ-AA6D	B
TCGA_TCGA-VQ-A8PO	B
TCGA_TCGA-VQ-A8DV	B
TCGA_TCGA-CD-A48A	B
TCGA_TCGA-CG-4301	A
TCGA_TCGA-BR-8487	B
TCGA_TCGA-RD-A8N9	A
TCGA_TCGA-BR-6454	A
TCGA_TCGA-D7-8578	A
TCGA_TCGA-CD-A486	B
TCGA_TCGA-CG-5734	B
TCGA_TCGA-CG-4469	B
TCGA_TCGA-CG-5722	B
TCGA_TCGA-IN-A7NU	B
TCGA_TCGA-D7-8575	A
TCGA_TCGA-VQ-A91N	B
TCGA_TCGA-R5-A7O7	B
TCGA_TCGA-D7-6526	B
TCGA_TCGA-IN-A6RS	B
TCGA_TCGA-CD-5798	A
TCGA_TCGA-D7-6528	B
TCGA_TCGA-VQ-A8PP	A
TCGA_TCGA-B7-5818	B
TCGA_TCGA-CG-4437	B
TCGA_TCGA-IN-8462	B
TCGA_TCGA-HU-A4H4	B
TCGA_TCGA-BR-6457	A
TCGA_TCGA-BR-6803	A
TCGA_TCGA-CD-5804	B
TCGA_TCGA-D7-8572	A
TCGA_TCGA-BR-8592	A
TCGA_TCGA-D7-6520	B
TCGA_TCGA-BR-6707	B
TCGA_TCGA-HU-A4GX	B
TCGA_TCGA-BR-8371	A
TCGA_TCGA-D7-A748	B
TCGA_TCGA-HU-A4G8	B
TCGA_TCGA-RD-A7BW	A
TCGA_TCGA-BR-4371	B
TCGA_TCGA-CG-4466	B
TCGA_TCGA-CG-4306	A
TCGA_TCGA-D7-A6EY	B
TCGA_TCGA-CD-8528	B
TCGA_TCGA-RD-A8N1	B
TCGA_TCGA-VQ-AA69	B
TCGA_TCGA-VQ-A92D	B
TCGA_TCGA-BR-8289	A
TCGA_TCGA-BR-8295	B
TCGA_TCGA-VQ-A91Q	A
TCGA_TCGA-BR-8296	B
TCGA_TCGA-CD-8533	A
TCGA_TCGA-CG-4477	A
TCGA_TCGA-VQ-A8P3	A
TCGA_TCGA-RD-A8N0	A
TCGA_TCGA-BR-7722	B
TCGA_TCGA-CG-4441	B
TCGA_TCGA-BR-6453	B
GSE84437_GSM2235556	B
GSE84437_GSM2235557	B
GSE84437_GSM2235558	B
GSE84437_GSM2235559	B
GSE84437_GSM2235560	B
GSE84437_GSM2235561	B
GSE84437_GSM2235562	B
GSE84437_GSM2235563	B
GSE84437_GSM2235564	B
GSE84437_GSM2235565	A
GSE84437_GSM2235566	B
GSE84437_GSM2235567	B
GSE84437_GSM2235568	B
GSE84437_GSM2235569	B
GSE84437_GSM2235570	B
GSE84437_GSM2235571	B
GSE84437_GSM2235572	B
GSE84437_GSM2235573	B
GSE84437_GSM2235574	B
GSE84437_GSM2235575	B
GSE84437_GSM2235576	B
GSE84437_GSM2235577	A
GSE84437_GSM2235578	B
GSE84437_GSM2235579	A
GSE84437_GSM2235580	A
GSE84437_GSM2235582	B
GSE84437_GSM2235584	B
GSE84437_GSM2235585	B
GSE84437_GSM2235586	A
GSE84437_GSM2235587	B
GSE84437_GSM2235588	A
GSE84437_GSM2235589	B
GSE84437_GSM2235593	B
GSE84437_GSM2235595	A
GSE84437_GSM2235596	B
GSE84437_GSM2235597	B
GSE84437_GSM2235598	B
GSE84437_GSM2235599	B
GSE84437_GSM2235600	B
GSE84437_GSM2235601	A
GSE84437_GSM2235602	B
GSE84437_GSM2235603	B
GSE84437_GSM2235604	B
GSE84437_GSM2235605	B
GSE84437_GSM2235606	A
GSE84437_GSM2235607	A
GSE84437_GSM2235608	B
GSE84437_GSM2235609	A
GSE84437_GSM2235610	A
GSE84437_GSM2235611	B
GSE84437_GSM2235612	A
GSE84437_GSM2235613	B
GSE84437_GSM2235614	B
GSE84437_GSM2235615	B
GSE84437_GSM2235616	B
GSE84437_GSM2235617	B
GSE84437_GSM2235618	B
GSE84437_GSM2235619	B
GSE84437_GSM2235620	B
GSE84437_GSM2235621	B
GSE84437_GSM2235622	A
GSE84437_GSM2235623	B
GSE84437_GSM2235624	B
GSE84437_GSM2235625	A
GSE84437_GSM2235626	A
GSE84437_GSM2235627	B
GSE84437_GSM2235628	A
GSE84437_GSM2235629	A
GSE84437_GSM2235630	A
GSE84437_GSM2235631	B
GSE84437_GSM2235632	B
GSE84437_GSM2235633	A
GSE84437_GSM2235634	B
GSE84437_GSM2235635	B
GSE84437_GSM2235636	A
GSE84437_GSM2235637	B
GSE84437_GSM2235695	B
GSE84437_GSM2235696	B
GSE84437_GSM2235697	B
GSE84437_GSM2235698	B
GSE84437_GSM2235699	B
GSE84437_GSM2235700	B
GSE84437_GSM2235701	B
GSE84437_GSM2235702	A
GSE84437_GSM2235703	A
GSE84437_GSM2235704	A
GSE84437_GSM2235705	A
GSE84437_GSM2235706	B
GSE84437_GSM2235707	B
GSE84437_GSM2235708	B
GSE84437_GSM2235709	B
GSE84437_GSM2235710	A
GSE84437_GSM2235711	B
GSE84437_GSM2235712	B
GSE84437_GSM2235713	A
GSE84437_GSM2235714	B
GSE84437_GSM2235715	A
GSE84437_GSM2235716	A
GSE84437_GSM2235717	A
GSE84437_GSM2235718	A
GSE84437_GSM2235719	B
GSE84437_GSM2235720	B
GSE84437_GSM2235721	B
GSE84437_GSM2235722	B
GSE84437_GSM2235723	B
GSE84437_GSM2235724	A
GSE84437_GSM2235725	A
GSE84437_GSM2235726	A
GSE84437_GSM2235727	B
GSE84437_GSM2235728	A
GSE84437_GSM2235729	A
GSE84437_GSM2235730	B
GSE84437_GSM2235731	B
GSE84437_GSM2235732	A
GSE84437_GSM2235733	B
GSE84437_GSM2235734	B
GSE84437_GSM2235735	B
GSE84437_GSM2235736	B
GSE84437_GSM2235737	A
GSE84437_GSM2235738	B
GSE84437_GSM2235739	B
GSE84437_GSM2235740	B
GSE84437_GSM2235741	B
GSE84437_GSM2235742	B
GSE84437_GSM2235743	B
GSE84437_GSM2235744	B
GSE84437_GSM2235745	A
GSE84437_GSM2235746	B
GSE84437_GSM2235747	A
GSE84437_GSM2235748	A
GSE84437_GSM2235749	B
GSE84437_GSM2235750	A
GSE84437_GSM2235751	B
GSE84437_GSM2235752	B
GSE84437_GSM2235753	A
GSE84437_GSM2235754	A
GSE84437_GSM2235755	A
GSE84437_GSM2235756	A
GSE84437_GSM2235757	A
GSE84437_GSM2235758	B
GSE84437_GSM2235759	A
GSE84437_GSM2235760	A
GSE84437_GSM2235761	A
GSE84437_GSM2235762	B
GSE84437_GSM2235763	B
GSE84437_GSM2235764	B
GSE84437_GSM2235765	A
GSE84437_GSM2235766	B
GSE84437_GSM2235767	A
GSE84437_GSM2235768	A
GSE84437_GSM2235769	B
GSE84437_GSM2235770	B
GSE84437_GSM2235771	B
GSE84437_GSM2235772	A
GSE84437_GSM2235773	A
GSE84437_GSM2235774	A
GSE84437_GSM2235775	A
GSE84437_GSM2235776	A
GSE84437_GSM2235777	A
GSE84437_GSM2235778	B
GSE84437_GSM2235779	B
GSE84437_GSM2235780	B
GSE84437_GSM2235781	A
GSE84437_GSM2235782	A
GSE84437_GSM2235783	A
GSE84437_GSM2235784	B
GSE84437_GSM2235785	A
GSE84437_GSM2235786	A
GSE84437_GSM2235787	A
GSE84437_GSM2235788	A
GSE84437_GSM2235789	B
GSE84437_GSM2235790	A
GSE84437_GSM2235791	A
GSE84437_GSM2235792	A
GSE84437_GSM2235793	A
GSE84437_GSM2235794	A
GSE84437_GSM2235795	A
GSE84437_GSM2235796	A
GSE84437_GSM2235797	B
GSE84437_GSM2235798	B
GSE84437_GSM2235799	B
GSE84437_GSM2235800	A
GSE84437_GSM2235801	A
GSE84437_GSM2235802	A
GSE84437_GSM2235803	B
GSE84437_GSM2235804	A
GSE84437_GSM2235805	A
GSE84437_GSM2235806	B
GSE84437_GSM2235807	B
GSE84437_GSM2235808	B
GSE84437_GSM2235809	B
GSE84437_GSM2235810	B
GSE84437_GSM2235811	A
GSE84437_GSM2235812	B
GSE84437_GSM2235813	B
GSE84437_GSM2235814	A
GSE84437_GSM2235815	B
GSE84437_GSM2235816	B
GSE84437_GSM2235817	B
GSE84437_GSM2235818	B
GSE84437_GSM2235819	A
GSE84437_GSM2235820	A
GSE84437_GSM2235821	A
GSE84437_GSM2235822	B
GSE84437_GSM2235823	A
GSE84437_GSM2235824	A
GSE84437_GSM2235825	A
GSE84437_GSM2235826	B
GSE84437_GSM2235827	A
GSE84437_GSM2235828	A
GSE84437_GSM2235829	B
GSE84437_GSM2235830	B
GSE84437_GSM2235831	A
GSE84437_GSM2235837	A
GSE84437_GSM2235838	A
GSE84437_GSM2235839	B
GSE84437_GSM2235840	A
GSE84437_GSM2235841	A
GSE84437_GSM2235842	B
GSE84437_GSM2235843	A
GSE84437_GSM2235844	B
GSE84437_GSM2235845	A
GSE84437_GSM2235846	A
GSE84437_GSM2235847	A
GSE84437_GSM2235848	A
GSE84437_GSM2235849	A
GSE84437_GSM2235850	A
GSE84437_GSM2235851	B
GSE84437_GSM2235852	A
GSE84437_GSM2235853	B
GSE84437_GSM2235854	A
GSE84437_GSM2235855	A
GSE84437_GSM2235862	B
GSE84437_GSM2235863	A
GSE84437_GSM2235864	A
GSE84437_GSM2235865	B
GSE84437_GSM2235866	A
GSE84437_GSM2235867	B
GSE84437_GSM2235878	B
GSE84437_GSM2235879	A
GSE84437_GSM2235880	A
GSE84437_GSM2235881	B
GSE84437_GSM2235882	A
GSE84437_GSM2235883	A
GSE84437_GSM2235884	A
GSE84437_GSM2235885	A
GSE84437_GSM2235886	A
GSE84437_GSM2235887	A
GSE84437_GSM2235888	A
GSE84437_GSM2235889	B
GSE84437_GSM2235899	A
GSE84437_GSM2235900	A
GSE84437_GSM2235901	B
GSE84437_GSM2235902	A
GSE84437_GSM2235903	B
GSE84437_GSM2235904	B
GSE84437_GSM2235905	A
GSE84437_GSM2235906	B
GSE84437_GSM2235907	B
GSE84437_GSM2235908	A
GSE84437_GSM2235909	B
GSE84437_GSM2235910	A
GSE84437_GSM2235921	B
GSE84437_GSM2235922	B
GSE84437_GSM2235923	B
GSE84437_GSM2235924	B
GSE84437_GSM2235925	B
GSE84437_GSM2235926	A
GSE84437_GSM2235927	B
GSE84437_GSM2235928	B
GSE84437_GSM2235929	A
GSE84437_GSM2235930	B
GSE84437_GSM2235931	B
GSE84437_GSM2235932	B
GSE84437_GSM2235933	A
GSE84437_GSM2235934	A
GSE84437_GSM2235935	B
GSE84437_GSM2235936	B
GSE84437_GSM2235937	B
GSE84437_GSM2235938	B
GSE84437_GSM2235939	A
GSE84437_GSM2235940	A
GSE84437_GSM2235941	B
GSE84437_GSM2235942	B
GSE84437_GSM2235943	A
GSE84437_GSM2235944	A
GSE84437_GSM2235945	B
GSE84437_GSM2235946	B
GSE84437_GSM2235947	B
GSE84437_GSM2235948	A
GSE84437_GSM2235949	B
GSE84437_GSM2235950	A
GSE84437_GSM2235951	A
GSE84437_GSM2235952	B
GSE84437_GSM2235953	A
GSE84437_GSM2235954	A
GSE84437_GSM2235955	B
GSE84437_GSM2235956	B
GSE84437_GSM2235957	B
GSE84437_GSM2235958	A
GSE84437_GSM2235959	B
GSE84437_GSM2235960	B
GSE84437_GSM2235961	A
GSE84437_GSM2235962	B
GSE84437_GSM2235963	B
GSE84437_GSM2235964	B
GSE84437_GSM2235965	B
GSE84437_GSM2235966	B
GSE84437_GSM2235967	B
GSE84437_GSM2235968	A
GSE84437_GSM2235969	B
GSE84437_GSM2235970	B
GSE84437_GSM2235971	B
GSE84437_GSM2235972	B
GSE84437_GSM2235973	B
GSE84437_GSM2235974	B
GSE84437_GSM2235975	B
GSE84437_GSM2235976	B
GSE84437_GSM2235977	B
GSE84437_GSM2235978	B
GSE84437_GSM2235979	B
GSE84437_GSM2235980	A
GSE84437_GSM2235981	B
GSE84437_GSM2235982	B
GSE84437_GSM2235983	A
GSE84437_GSM2235984	B
GSE84437_GSM2235985	B
GSE84437_GSM2235986	B
GSE84437_GSM2235987	B
GSE84437_GSM2235988	B
GSE84437_GSM2235991	B
GSE84437_GSM2235992	B
GSE84437_GSM2235993	A
GSE84437_GSM2235994	A
GSE84437_GSM2235995	B
GSE84437_GSM2235996	B
GSE84437_GSM2235997	B
GSE84437_GSM2235998	B
GSE84437_GSM2235999	B
GSE84437_GSM2236000	B
GSE84437_GSM2236001	A
GSE84437_GSM2236002	B
GSE84437_GSM2236003	A
GSE84437_GSM2236004	B
GSE84437_GSM2236005	B
GSE84437_GSM2236006	B
GSE84437_GSM2236007	A
GSE84437_GSM2236008	A
GSE84437_GSM2236009	B
GSE84437_GSM2236010	B
GSE84437_GSM2236011	A
GSE84437_GSM2236012	A
GSE84437_GSM2236013	B
GSE84437_GSM2236014	B
GSE84437_GSM2236015	A
GSE84437_GSM2236016	A
GSE84437_GSM2236017	A
GSE84437_GSM2236018	A
GSE84437_GSM2236019	B
GSE84437_GSM2236020	B
GSE84437_GSM2236021	A
GSE84437_GSM2236022	B
GSE84437_GSM2236023	B
GSE84437_GSM2236024	B
GSE84437_GSM2236025	A
GSE84437_GSM2236026	A
GSE84437_GSM2236027	A
GSE84437_GSM2236028	B
GSE84437_GSM2236029	B
GSE84437_GSM2236030	B
GSE84437_GSM2236031	A
GSE84437_GSM2236032	B
GSE84437_GSM2236033	A
GSE84437_GSM2236034	B
GSE84437_GSM2236036	B
GSE84437_GSM2236037	A
GSE84437_GSM2236038	A
GSE84437_GSM2236039	A
GSE84437_GSM2236040	B
GSE84437_GSM2236041	A
GSE84437_GSM2236042	B
GSE84437_GSM2236043	A
GSE84437_GSM2236044	B
GSE84437_GSM2236045	B
GSE84437_GSM2236046	B
GSE84437_GSM2236047	A
GSE84437_GSM2236048	B
GSE84437_GSM2236049	A
GSE84437_GSM2236050	B
GSE84437_GSM2236051	A
GSE84437_GSM2236052	A
GSE84437_GSM2236053	A
GSE84437_GSM2236054	A
GSE84437_GSM2236055	B
GSE84437_GSM2236056	B
GSE84437_GSM2236057	A
GSE84437_GSM2236058	A
GSE84437_GSM2236059	A
GSE84437_GSM2236060	A
GSE84437_GSM2236061	A
GSE84437_GSM2236062	B
GSE84437_GSM2236063	B
GSE84437_GSM2236064	B
GSE84437_GSM2236065	A
GSE84437_GSM2236066	A
GSE84437_GSM2236067	A
GSE84437_GSM2236068	A
GSE84437_GSM2236069	B
GSE84437_GSM2236070	B
GSE84437_GSM2236071	A
GSE84437_GSM2236072	A
GSE84437_GSM2236073	B
GSE84437_GSM2236074	A
GSE84437_GSM2236075	A
GSE84437_GSM2236076	A
GSE84437_GSM2236077	B
GSE84437_GSM2236078	B
GSE84437_GSM2236079	B
GSE84437_GSM2236080	A
GSE84437_GSM2236082	B
GSE84437_GSM2236083	B
GSE84437_GSM2236084	B
GSE84437_GSM2236085	B
GSE84437_GSM2236086	A
GSE84437_GSM2236087	B
GSE84437_GSM2236088	A
GSE84437_GSM2236089	B
GSE84437_GSM2236090	A
GSE84437_GSM2236091	A
GSE84437_GSM2236092	A
GSE84437_GSM2236093	B
GSE84437_GSM2236094	B
GSE84437_GSM2236095	A
