# Supplementary material for: Integrative proteomics and m6A microarray analyses of the signatures induced by METTL3 reveals prognostically significant in gastric cancer by affecting cellular metabolism
Source: Front Oncol. 2022 Nov 16;12:996329. doi: 10.3389/fonc.2022.996329 (PMC9709115; doi:10.3389/fonc.2022.996329)
Supplement: Supplementary file 7 [file Table_6.xls]

## Sheet: Sheet1
Overexpressoion Proteins	Hypermethylation Genes	Merged Genes
CDA	GNL3	DNAJB1
HEL-S-21	RBM4	AVEN
SCRN1	TRAPPC3	DAZAP2
MIB1	HCFC1R1	EPB41L3
HEL-S-71	NRDC	OPLAH
PTAR1	SGK1
LASP1	SMUG1
CKS1B	ARHGAP29
HEL-S-265	H2AFJ
TAGLN2	TCEANC
HEL-S-47e	WDR13
UCKL1	CNDP2
ADI1	CXorf38
ANXA5	CA1
TALDO1	DEF8
SAMD11	DYRK3
DBI	SKIV2L
ENO1	DAZAP2
DDT	AP4B1
FLNA	CRELD1
CNN2	ADAMDEC1
HEL-S-115	MAGEA6
TPM4	CNN3
DNPEP	OSBPL2
FKBP1A	IQCG
VASN	ISLR2
TRIP10	OTOG
MAP4K4	STAT3
PPIA	TMUB1
PARVA	CCDC137
IMPA2	AVEN
ANXA3	TNFRSF14
GSPT2	MFSD9
TPD52	C2orf82
NME1-NME2	MYL12B
DNAJB1	TMEM186
METTL3	FBXO33
SERPINB6	GOLPH3L
NOLC1	DIO3
UNC119B	STC1
HINT1	AIFM1
SOD1	MICA
AVEN	LTBP3
DAZAP2	TP53BP1
HMGB3	TMEM214
DCK	TIMM8A
S100A6	DYRK1B
TUBB4A	SUSD2
MDA5	ADAMTS15
GLRX	FCRLA
NME1	EIF6
GLCCI1	PCYT1A
TUSC1	XPNPEP1
NUCKS1	C17orf62
METAP2	ZNF594
METAP2	AC007216.2
HLA-C	TUBA1A
MBNL1	GRHPR
EPB41L3	PHB
HLA-A	CATG00000076354.1
KRT1	CNOT2
GCHFR	SNX3
ARPP19	C11orf86
TNNC1	APOBEC3B
HMGN3	TPM1
PAGE1	ZNF18
TCEAL4	CATG00000101321.1
PTBP1	RBM14-RBM4
HMGN4	CTPS1
TMSB10	ATG4A
CRIP1	PMF1-BGLAP
H2AW	DTNB
HLA-A	C1orf54
HLA-B	ATP6V0A4
OPLAH	COL17A1
H2AC20	C9orf78
TMSB4X	PDCL3
HMGN2	TRMT2A
EmGFP-LacZ-E2F-TdTom	FKBP4
	EXD3
	MRPL51
	SNAP47
	THUMPD3
	CLPP
	GALNT2
	CLDN4
	B9D2
	TIMM17A
	CDK11A
	PTPN1
	SLC25A17
	UBE2C
	CXorf40B
	PPP5D1
	SHCBP1
	NDUFA8
	PDCD10
	NTM
	CYP21A2
	CCT7
	AL136376.1
	LPIN3
	PQBP1
	ZNF672
	MRPS26
	ENTPD2
	WDR66
	FAM135A
	ATP5A1
	ZNF789
	DNAJA1
	GPM6A
	CATG00000044153.1
	C12orf43
	PPM1H
	UBB
	TAF3
	BSCL2
	TMBIM6
	RNGTT
	USF1
	RPS9
	CHPF2
	ZCCHC17
	ZNF850
	NADK
	FARSB
	ARL1
	TYROBP
	SLC10A7
	GAPDH
	TRIM37
	HSPB1
	ZNF233
	PCYT2
	RPL19
	MTRNR2L7
	CCM2
	RSRC2
	MSN
	UBAP2L
	JMJD4
	C2orf42
	ACTN1
	VSIG8
	HSPH1
	MELTF
	SRPRB
	IQCK
	TMEM126B
	ZDHHC6
	MCCC1
	DTNBP1
	ATP1A1
	NFKBIE
	QRICH1
	TTC27
	RRBP1
	ASMTL
	TXNL4A
	CATG00000074839.1
	STIP1
	ALDH16A1
	DNMT3A
	OR51B5
	PDHA1
	TCEAL8
	DNAJB1
	AKT1S1
	CCNJL
	PHF7
	PRPSAP1
	UBE2J2
	BCORL1
	DNAJC25
	SKP2
	CRELD2
	KRT40
	UXS1
	PRG2
	MYL9
	PPT1
	TOLLIP
	PRSS23
	CHKB
	STAG2
	CATG00000028059.1
	SUGCT
	OXA1L
	HMGCR
	NOSTRIN
	TTC9B
	HNF4G
	IL1R1
	NPFFR1
	SRP19
	HRCT1
	ARPC5
	OR51B4
	ARL4A
	FAM111A
	FAM173B
	PLA1A
	CHMP6
	MGAT2
	ZIK1
	ABLIM2
	TRAF3IP2
	CDK5
	OPLAH
	EPB41L1
	RRAGA
	IFI44
	ALYREF
	LLNLR-275H8.1
	CPT1A
	TLCD1
	PRMT2
	RIC8B
	HEYL
	AP2B1
	KCNE1
	DEFB124
	C9orf114
	HDAC8
	DBN1
	CREB3
	BTN3A1
	TRIM71
	CBR3
	ABCF1
	OXCT2
	TRAPPC9
	CEP68
	P2RX4
	TOR1AIP2
	POLR1B
	CXCR4
	DFFA
	THBS3
	ALDH18A1
	RP11-108O10.8
	SPTLC3
	RHOV
	RBBP9
	CATG00000002617.1
	CATG00000033287.1
	RPS8
	NOP14
	FAM172A
	PDK3
	STRA13
	APBB1
	RRAGB
	ANAPC15
	PSMA5
	TXNRD3
	TCEAL9
	GPR50
	PAFAH1B3
	KDM8
	AES
	HIST1H2BK
	INF2
	PLCB2
	IL32
	CT45A7
	IP6K2
	PSG5
	CPA4
	PLEKHO2
	ALDH1B1
	ICOSLG
	BID
	BEX3
	FAM114A2
	C1GALT1C1
	TDRP
	RPS3
	PYCRL
	PTGS1
	KBTBD3
	PARP9
	WFS1
	DYNLL1
	SRSF5
	MPI
	MAGIX
	CLINT1
	MSH6
	BTN3A2
	CITED1
	GRIP2
	ACTG1
	FSTL1
	BTN3A3
	ATP5G1
	RRM2
	GEMIN6
	S100A4
	PRRG1
	MTERF4
	TNFRSF10D
	FDXACB1
	MRPS12
	ANKRD53
	SLC26A11
	TEX11
	DDHD1
	IZUMO2
	METTL25
	C10orf35
	CATG00000043880.1
	NDUFB6
	CBR1
	SYNJ2
	TDP1
	RTKN2
	VANGL1
	NCAM1
	SLC43A2
	SLC51B
	HMGA2
	EIF3M
	IGFBP3
	MRPS7
	RBBP7
	TSPYL1
	TACSTD2
	PCDH7
	ALDOA
	CFHR4
	TUBB6
	PSG1
	CARD8
	MAPKAP1
	BDH1
	UROS
	INSL4
	FAM46B
	MEIS2
	AGBL2
	PARD3B
	CDH5
	MMP24
	CHD1L
	AK124121
	ZNF468
	PCDHA7
	GMPPB
	NXPE3
	ARFGAP1
	MARCKS
	RAB30
	ACTRT3
	PSG8
	SSX2IP
	SRGN
	EDN2
	CFAP77
	ZBED2
	MOV10
	PLB1
	PSG4
	TMEM102
	FBXO21
	CRYBG2
	AOC1
	KLHL22
	HSPA8
	DDX24
	C1RL
	MEN1
	HOXC4
	LRRC15
	FAM127C
	CARD6
	FAM98A
	ZNF771
	TMEM74
	MMP7
	GBP1
	IDS
	GHRL
	ATP11C
	PSMD11
	HBG2
	CHRNE
	CPE
	MON2
	SUMO2
	LSM3
	PDE4DIP
	CPEB1
	ABRACL
	PSG6
	HEXIM1
	ADH4
	OR52R1
	HS3ST3A1
	GNE
	XAGE2
	CATG00000044521.1
	TMED3
	DEFB119
	HSPB3
	GZF1
	TAS2R43
	PCDHA5
	VTN
	ARHGEF6
	AIG1
	PSG11
	PLA2G3
	ZNF761
	ZNF618
	MAGEH1
	HSPA6
	PDE1A
	EPB41L3
	STEAP4
	NXF3
	ACOT7
	STEAP1B
	MAPK4
	RAI14
	CD33
	ZNF681
	ANO9
	MAGEB2
